# Supplementary material for: Understanding the tunable sodium storage performance in pillared MXenes: a first-principles study
Source: Royal Society of Chemistry journal article supplement (doi:10.1039/d2cp02961h), 2022-01-01
Supplement: d2cp02961h1.pdf [file d2cp02961h1.pdf]

# **Understanding the tunable sodium storage performance in pillared MXene: A first-principles study**

Li Dai, Jiahao Zhao, Qin Li, Maohui Chen, Haibo Li, Konggang Qu, Rui Li\*

Shandong Provincial Key Laboratory/Collaborative Innovation Center of Chemical Energy Storage & Novel Cell Technology, School of Chemistry and Chemical Engineering, Liaocheng University, Liaocheng 252000, China

\*Corresponding authors.

Rui Li

E-mail: lirui@lcu.edu.cn

## **Supplementary Material**

Table S1. Layer spacing before and after enforcing the optimization process of selected structures.

| Layer spacing (Å)<br>(Initial) | Layer spacing (Å) (after optimization) |                                     |                                                   |                                                   |
|--------------------------------|----------------------------------------|-------------------------------------|---------------------------------------------------|---------------------------------------------------|
|                                | Ti <sub>2</sub> CO <sub>2</sub> -SL    | Ti <sub>2</sub> CO <sub>2</sub> -DL | Ti <sub>3</sub> C <sub>2</sub> O <sub>2</sub> -SL | Ti <sub>3</sub> C <sub>2</sub> O <sub>2</sub> -DL |
| 3                              | 3.10                                   | 3.09                                | 3.08                                              | 3.06                                              |
| 4                              | 4.07                                   | 4.08                                | 4.06                                              | 4.05                                              |
| 5                              | 5.05                                   | 5.06                                | 5.05                                              | 5.06                                              |
| 6                              | 6.04                                   | 6.04                                | 6.08                                              | 6.04                                              |
| 7                              | 7.02                                   | 7.03                                | 7.03                                              | 7.03                                              |
| 8                              | 8.03                                   | 8.02                                | 8.02                                              | 8.03                                              |
| 9                              | 9.01                                   | 9.01                                | 9.00                                              | 9.02                                              |
| 10                             | 10.00                                  | 10.01                               | 10.01                                             | 10.01                                             |
| 12                             | 12.00                                  | 12.01                               | 12.00                                             | 12.01                                             |

Table S2. The adsorption energy of Na on selected structures with different layer spacing.

| Layer<br>spacing<br>(Å) | E <sub>a</sub> (eV per Na)          |        |        |      |                                                   |        |        |      |
|-------------------------|-------------------------------------|--------|--------|------|---------------------------------------------------|--------|--------|------|
|                         | Ti <sub>2</sub> CO <sub>2</sub> -SL |        |        |      | Ti <sub>3</sub> C <sub>2</sub> O <sub>2</sub> -SL |        |        |      |
|                         | 1/16 ML                             | 1/9 ML | 1/4 ML | 1 ML | 1/16 ML                                           | 1/9 ML | 1/4 ML | 1 ML |
| 3                       | 4.16                                | 4.20   | 3.81   | 3.72 | 4.61                                              | 4.53   | 4.27   | 3.82 |
| 3.5                     | 4.54                                | 4.35   | 4.06   | 3.93 | 4.89                                              | 4.82   | 4.46   | 3.97 |
| 4                       | 4.89                                | 4.66   | 4.50   | 4.07 | 5.07                                              | 5.00   | 4.70   | 4.13 |
| 4.5                     | 4.57                                | 4.51   | 4.05   | 3.49 | 4.92                                              | 4.90   | 4.51   | 3.56 |
| 5                       | 4.21                                | 4.11   | 3.58   | 3.21 | 4.63                                              | 4.58   | 4.32   | 3.35 |
| 5.5                     | 3.89                                | 3.82   | 3.49   | 2.37 | 4.41                                              | 4.38   | 4.10   | 2.83 |
| 6                       | 3.82                                | 3.73   | 3.41   | 2.01 | 4.33                                              | 4.31   | 3.96   | 2.35 |
| 7                       | 3.75                                | 3.69   | 3.39   | 1.97 | 4.21                                              | 4.12   | 3.74   | 2.26 |
| 8                       | 3.73                                | 3.63   | 3.39   | 1.96 | 4.18                                              | 4.08   | 3.69   | 2.24 |
| 9                       | 3.73                                | 3.63   | 3.37   | 1.95 | 4.17                                              | 4.06   | 3.66   | 2.24 |

Table S3. Calculated in-plane planar elastic constants  $C_{11}$  and Poisson's ratio ( $\nu$ ) of MXene-Na system at different layer spacing. The data in brackets correspond to the double Na-atomic layers adsorption system.

| Layer spacing (Å) | $C_{11}$ (N/m)                      |                                                   | $\nu$                               |                                                   |
|-------------------|-------------------------------------|---------------------------------------------------|-------------------------------------|---------------------------------------------------|
|                   | Ti <sub>2</sub> CO <sub>2</sub> -Na | Ti <sub>3</sub> C <sub>2</sub> O <sub>2</sub> -Na | Ti <sub>2</sub> CO <sub>2</sub> -Na | Ti <sub>3</sub> C <sub>2</sub> O <sub>2</sub> -Na |
| 3                 | 349                                 | 421                                               | 0.296                               | 0.279                                             |
| 4                 | 280                                 | 388                                               | 0.278                               | 0.257                                             |
| 5                 | 278 (336)                           | 381 (438)                                         | 0.212 (0.328)                       | 0.208 (0.298)                                     |
| 6                 | 286 (314)                           | 385 (406)                                         | 0.236 (0.288)                       | 0.214 (0.286)                                     |
| 7                 | 287 (301)                           | 393 (389)                                         | 0.242 (0.269)                       | 0.231 (0.272)                                     |
| 8                 | 291 (286)                           | 395 (375)                                         | 0.250 (0.260)                       | 0.239 (0.255)                                     |
| 9                 | 292 (274)                           | 394 (379)                                         | 0.255 (0.259)                       | 0.243 (0.257)                                     |

Table S4. The adsorption energy of Na on selected structures with different layer spacing at 1 ML Na coverage.

| Layer spacing (Å) | $E_a$ (eV per Na)          |                             |
|-------------------|----------------------------|-----------------------------|
|                   | $Ti_2CO_2$ (C-Ti stacking) | $Ti_3C_2O_2$ (C-C stacking) |
| 3                 | 3.21                       | 3.89                        |
| 4                 | 3.66                       | 4.13                        |
| 5                 | 2.69                       | 3.34                        |
| 6                 | 1.93                       | 2.3                         |
| 7                 | 1.91                       | 2.19                        |
| 8                 | 1.9                        | 2.18                        |

Table S5. The normalized values of all the characteristic indicators by the Min-max standardization method. The normalized equation for  $E_a$  and  $C_{11}$  is  $X = (x - \min)/(\max - \min)$ , and for  $EB_d$  and  $v$  is  $X = (\max - x)/(\max - \min)$ . All  $EB_d$  data (C-C stacking and C-Ti stacking) were combined together for normalized calculation.

| <b>MXene</b>                                  | <b>Layer spacing (Å)</b> | <b><math>E_a</math></b> | <b><math>EB_d</math> (C-C stacking)</b> | <b><math>EB_d</math> (C-Ti stacking)</b> | <b><math>C_{11}</math></b> | <b><math>v</math></b> |
|-----------------------------------------------|--------------------------|-------------------------|-----------------------------------------|------------------------------------------|----------------------------|-----------------------|
| Ti <sub>2</sub> CO <sub>2</sub>               | 5                        | 0.48                    | 0                                       | 1                                        | 1                          | 0                     |
|                                               | 6                        | 0.76                    | 0.55                                    | 0.90                                     | 0.57                       | 0.59                  |
|                                               | 7                        | 1                       | 0.65                                    | 0.75                                     | 0.30                       | 0.87                  |
|                                               | 8                        | 0                       | 0.68                                    | 0.71                                     | 0                          | 1                     |
| Ti <sub>3</sub> C <sub>2</sub> O <sub>2</sub> | 5                        | 0.44                    | 0                                       | 1                                        | 1                          | 0                     |
|                                               | 6                        | 1                       | 0.67                                    | 0.85                                     | 0.50                       | 0.28                  |
|                                               | 7                        | 0                       | 0.71                                    | 0.81                                     | 0.22                       | 0.60                  |
|                                               | 8                        | 0.33                    | 0.75                                    | 0.77                                     | 0                          | 1                     |

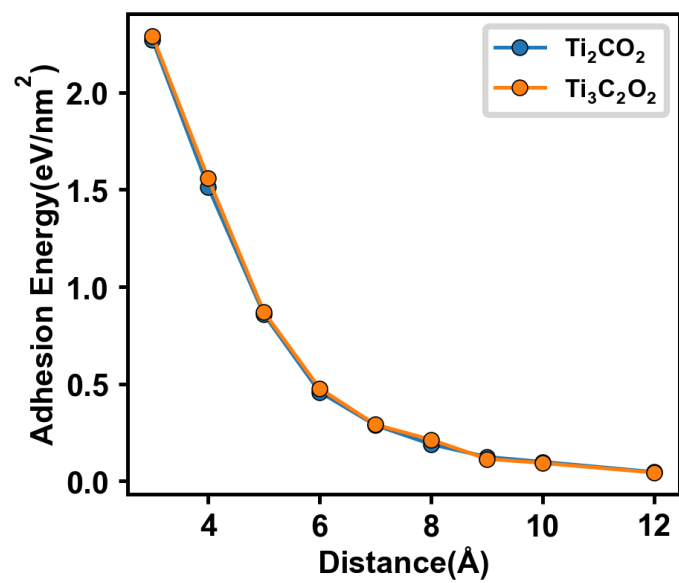

Fig. S1. Distribution of the adhesion energy between MXene layers with different layer spacing for double-layer MXene models.

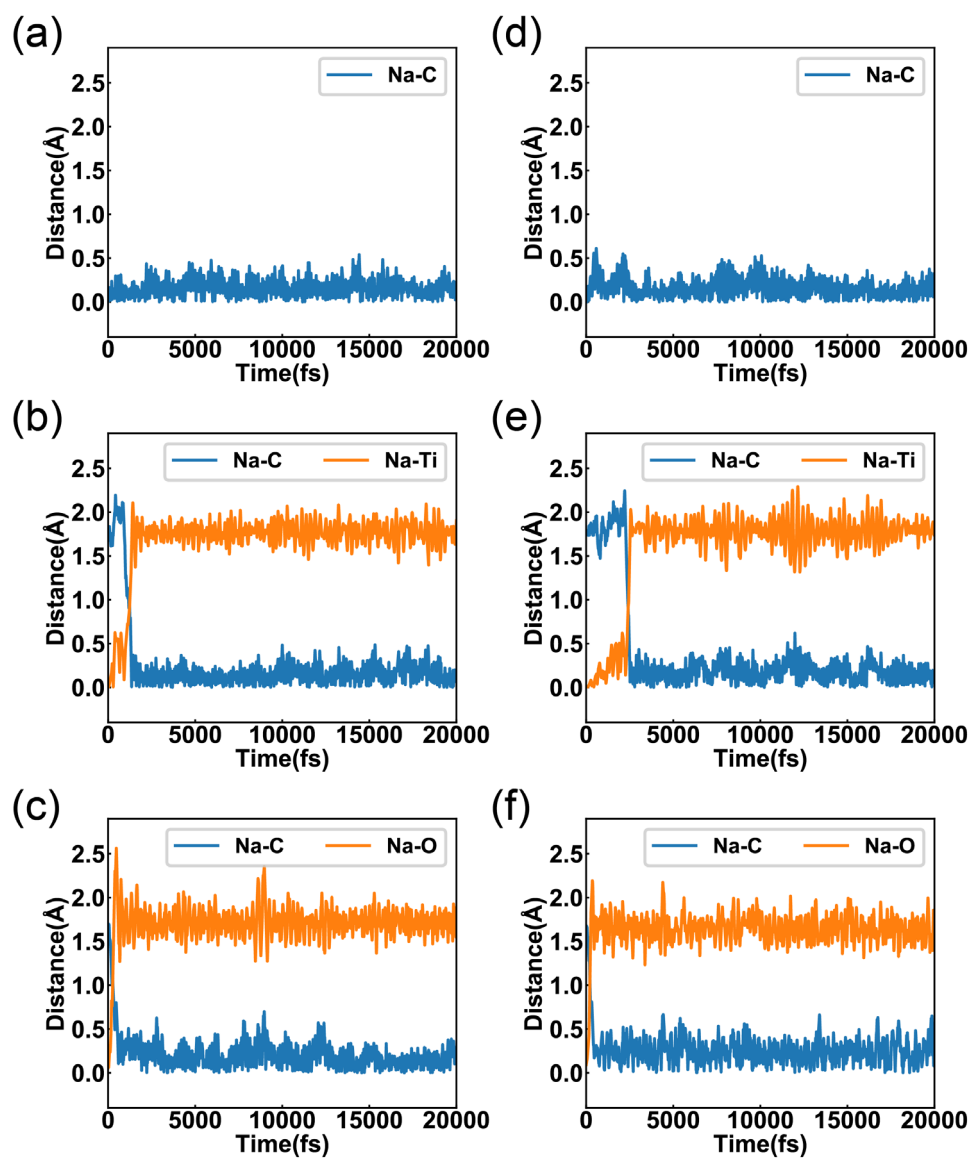

Fig. S2. Change of the distance in the x-y plane between Na and the initial and final adsorption site along the MD simulation time. (a) The initial and final adsorption site is C in  $Ti_2CO_2$ , (b) The initial adsorption site is Ti and the final adsorption site is C site in  $Ti_2CO_2$ , (c) The initial adsorption site is O and the final adsorption site is C site in  $Ti_2CO_2$ , (d) The initial and final adsorption site is C in  $Ti_3C_2O_2$ , (e) The initial adsorption site is Ti and the final adsorption site is C site in  $Ti_3C_2O_2$ , (f) The initial adsorption site is O and the final adsorption site is C in  $Ti_3C_2O_2$ .



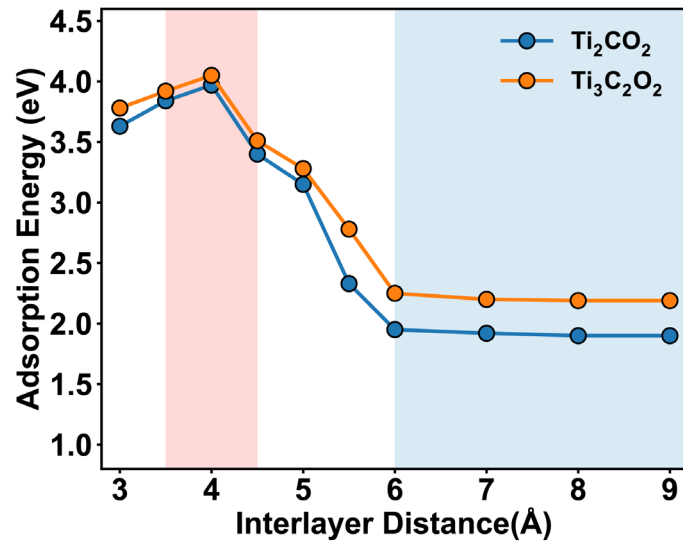

Fig. S3. Change of the Na adsorption energy with layer spacing in double-layer MXene models.

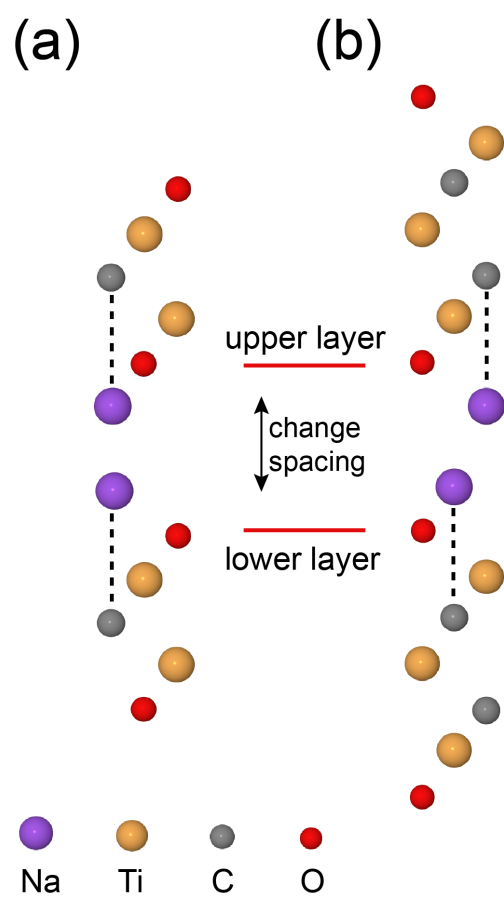

Fig. S4. Schematic diagram illustrating double Na-atomic layers adsorption in 1 x 1 MXene model (a)  $\text{Ti}_2\text{CO}_2$  and (b)  $\text{Ti}_3\text{C}_2\text{O}_2$ .

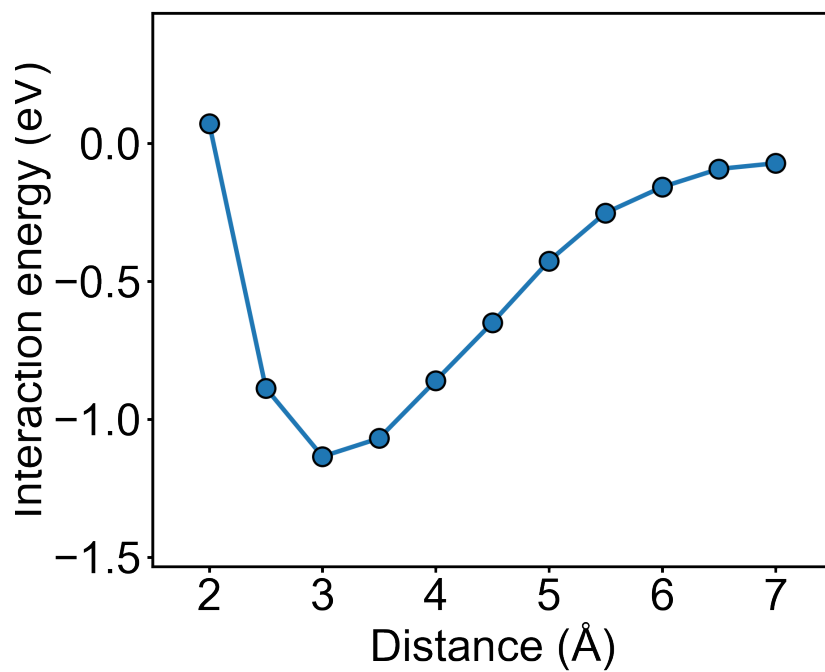

Fig. S5. The interaction energy between two Na atoms as a function of Na-Na distance.
